# Supplementary material for: The use of differential privacy for census data and its impact on redistricting: The case of the 2020 U.S. Census
Source: PubMed Central journal article supplement — Sci Adv. 2021 Oct 6;7(41):eabk3283. doi: 10.1126/sciadv.abk3283 (PMC8494446; doi:10.1126/sciadv.abk3283), 2021-10-06
Supplement: sciadv.abk3283_sm.pdf [file sciadv.abk3283_sm.pdf]

Supplementary Materials for

**The use of differential privacy for census data and its impact on redistricting: The case of the 2020 U.S. Census**

Christopher T. Kenny, Shiro Kuriwaki, Cory McCartan, Evan T. R. Rosenman, Tyler Simko, Kosuke Imai\*

\*Corresponding author. Email: imai@harvard.edu

Published 6 October 2021, *Sci. Adv.* 7, eabk3283 (2021)  
DOI: 10.1126/sciadv.abk3283

**This PDF file includes:**

Correspondence Table  
Sections S1 to S4  
Figs. S3.1 to S3.4 and S4.1 to S4.9  
Tables S1.1 to S1.3, S2.1, and S4.1 to S4.3

The supplementary materials contain the same type of analysis as the main text done with different versions of the DAS. See the correspondence table below.

|                                           | DAS-4.5                                                                   | DAS-12.2                   | DAS-19.61                  |
|-------------------------------------------|---------------------------------------------------------------------------|----------------------------|----------------------------|
| Errors by Race                            | Fig. <a href="#">S3.2</a>                                                 | Fig. 1                     | Fig. <a href="#">S4.1</a>  |
| Errors by Heterogeneity                   | Fig. <a href="#">S3.3</a>                                                 | Fig. 2                     | Fig. <a href="#">S4.2</a>  |
| Errors by Democratic vote                 | Fig. <a href="#">S3.4</a>                                                 | Fig. <a href="#">S3.1</a>  | Fig. <a href="#">S4.3</a>  |
| Population Parity (Pennsylvania)          |                                                                           | Fig. 3                     | -                          |
| Population Parity (Louisiana)             |                                                                           | Fig. 4                     | Fig. <a href="#">S4.4</a>  |
| Simulations for Democratic vote           |                                                                           | Fig. 5                     | Fig. <a href="#">S4.5</a>  |
| Simulations for Minority share            |                                                                           | Fig. 6                     | Fig. <a href="#">S4.6</a>  |
| Simulations of MMD probability            |                                                                           | Fig. 7                     | Fig. <a href="#">S4.7</a>  |
| Accuracy of BISG                          |                                                                           | Fig. 8                     | Fig. <a href="#">S4.8</a>  |
| False Negatives / False Positives of BISG | Tables <a href="#">S1.1</a> , <a href="#">S1.2</a> , <a href="#">S1.3</a> |                            | Table <a href="#">S4.1</a> |
| Block-level Predictions of Race           | -                                                                         | Fig. 9                     | Fig. <a href="#">S4.9</a>  |
| Simulations of MMDs in East Ramapo        | -                                                                         | Table <a href="#">S2.1</a> | Table <a href="#">S4.2</a> |
| Comparison with Enacted Maps              | Table <a href="#">S4.3</a>                                                | Table <a href="#">S4.3</a> | Table <a href="#">S4.3</a> |

## S1 Prediction of Individual Voters’ Race and Ethnicity: Accuracy Tables

Here, we give the full set of results for ethnicity classification on the North Carolina dataset. We assign each individual to the ethnic group with the highest posterior probability, using the Bayesian method described in the main text. Full results are given in Tables [S1.1](#), [S1.2](#), and [S1.3](#).

| Ethnicity | Data               | Census 2010 | DAS-4.5 | DAS-12.2 |
|-----------|--------------------|-------------|---------|----------|
|           | Overall Error Rate | 15.1%       | 15.6%   | 15.1%    |
| White     | False negative     | 7.5%        | 7.9%    | 7.6%     |
| White     | False positive     | 11.4%       | 11.7%   | 11.3%    |
| Black     | False negative     | 29.1%       | 29.7%   | 29.1%    |
| Black     | False positive     | 23.6%       | 24.2%   | 23.4%    |
| Hispanic  | False negative     | 30.3%       | 30.7%   | 27.7%    |
| Hispanic  | False positive     | 29.1%       | 29.9%   | 29.0%    |
| Asian     | False negative     | 36.2%       | 38.2%   | 34.9%    |
| Asian     | False positive     | 35.4%       | 35.1%   | 34.3%    |
| Other     | False negative     | 75.1%       | 76.0%   | 75.0%    |
| Other     | False positive     | 35.1%       | 50.1%   | 43.9%    |

**Table S1.1:** Overall classification error rate as well as false positive (Type I error) and false negative (Type II error) rates for White, Black, Hispanic, Asian, and Other voters using prediction based on geography and **last names only**. We classify each registered voter to the racial / ethnic category with the greatest predicted probability. The columns refer to the different datasets we use to set geographic ethnicity priors at the Census Block level.

| <b>Ethnicity</b> | <b>Data</b>        | <b>Census 2010</b> | <b>DAS-4.5</b> | <b>DAS-12.2</b> |
|------------------|--------------------|--------------------|----------------|-----------------|
|                  | Overall Error Rate | 12.1%              | 12.5%          | 12.0%           |
| White            | False negative     | 5.4%               | 5.8%           | 5.5%            |
| White            | False positive     | 9.3%               | 9.4%           | 9.1%            |
| Black            | False negative     | 23.4%              | 23.9%          | 23.3%           |
| Black            | False positive     | 17.3%              | 17.8%          | 17.1%           |
| Hispanic         | False negative     | 28.2%              | 28.1%          | 25.3%           |
| Hispanic         | False positive     | 25.1%              | 26.1%          | 24.9%           |
| Asian            | False negative     | 29.2%              | 31.2%          | 28.1%           |
| Asian            | False positive     | 30.6%              | 30.5%          | 29.5%           |
| Other            | False negative     | 69.8%              | 71.1%          | 69.5%           |
| Other            | False positive     | 36.6%              | 48.0%          | 43.5%           |

*Table S1.2: Error rates using prediction based on geography as well as last and first names, for each geographic prior.*

| <b>Ethnicity</b> | <b>Data</b>        | <b>Census 2010</b> | <b>DAS-4.5</b> | <b>DAS-12.2</b> |
|------------------|--------------------|--------------------|----------------|-----------------|
|                  | Overall Error Rate | 10.0%              | 10.3%          | 9.9%            |
| White            | False negative     | 3.9%               | 4.2%           | 4.0%            |
| White            | False positive     | 8.0%               | 8.1%           | 7.8%            |
| Black            | False negative     | 20.4%              | 20.9%          | 20.2%           |
| Black            | False positive     | 12.6%              | 12.9%          | 12.3%           |
| Hispanic         | False negative     | 25.2%              | 24.9%          | 22.1%           |
| Hispanic         | False positive     | 21.5%              | 22.6%          | 21.5%           |
| Asian            | False negative     | 22.8%              | 24.7%          | 21.8%           |
| Asian            | False positive     | 26.3%              | 26.4%          | 25.3%           |
| Other            | False negative     | 64.2%              | 66.0%          | 63.9%           |
| Other            | False positive     | 35.6%              | 45.1%          | 41.3%           |

*Table S1.3: Error rates using prediction based on geography as well as last, first, and middle names, for each geographic prior.*

## S2 Majority Minority Districts from Block Level Simulations

The redistricting simulation findings in the East Ramapo Central School District suggest that, under the DAS-12.2 data, we estimate fewer majority minority districts than would have been estimated under the Census 2010 data.

**Table S2.1:** *East Ramapo MMDs under Census 2010 and DAS-12.2 data. The noise introduced in the DAS-12.2 leads us to undercount the number of majority minority districts in many plans, but never to overcount them.*

| Census 2010 | Number of MMDs from DAS-12.2 |           |           |          | Plans |
|-------------|------------------------------|-----------|-----------|----------|-------|
|             | 0                            | 1         | 2         | 3        |       |
| 0           | <b>100%</b>                  | 0         | 0         | 0        | 50    |
| 1           | 10                           | <b>90</b> | 0         | 0        | 3103  |
| 2           | 2                            | 56        | <b>42</b> | 0        | 6774  |
| 3           | 0                            | 77        | 22        | <b>0</b> | 73    |

Note: Percentages add to 100% by row.

## S3 Undercounting Bias along Partisanship and with the DAS-4.5

In Figures 1 and 2 of the main text, we detail bias in total population counts along non-white and precinct diversity measures. In Figure S3.1 we demonstrate that this persists along partisan dimensions.

We next replicate three figures from the main paper using the DAS-4.5 data in place of the DAS-12.2 data. This comparison, along with our subsequent results for the DAS-19.61, demonstrates that the bias occurs across levels of the privacy budget. Figure S3.3 follows Figure 2, Figure S3.4 follows Figure S3.1, and Figure S3.2 follows Figure 1.

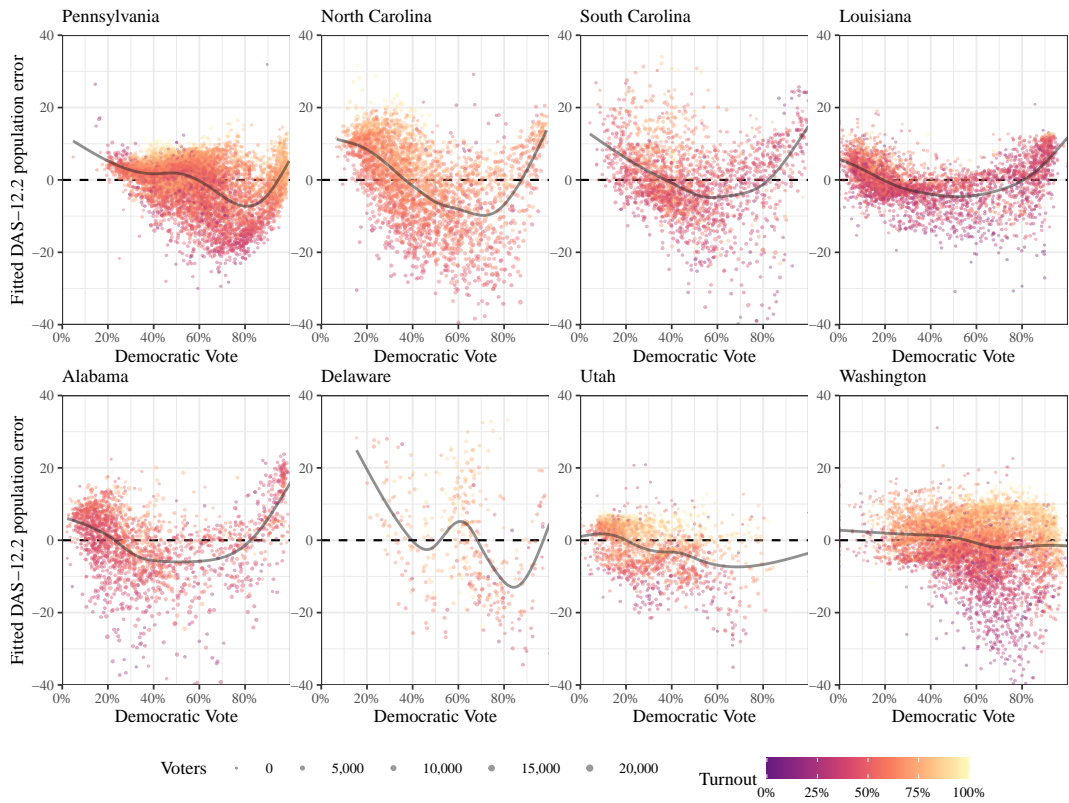

*Figure S3.1: Model-smoothed error in precinct populations by Democratic two-party vote share, with color indicating turnout. A GAM smooth is overlaid to show the mean error by Democratic share.*

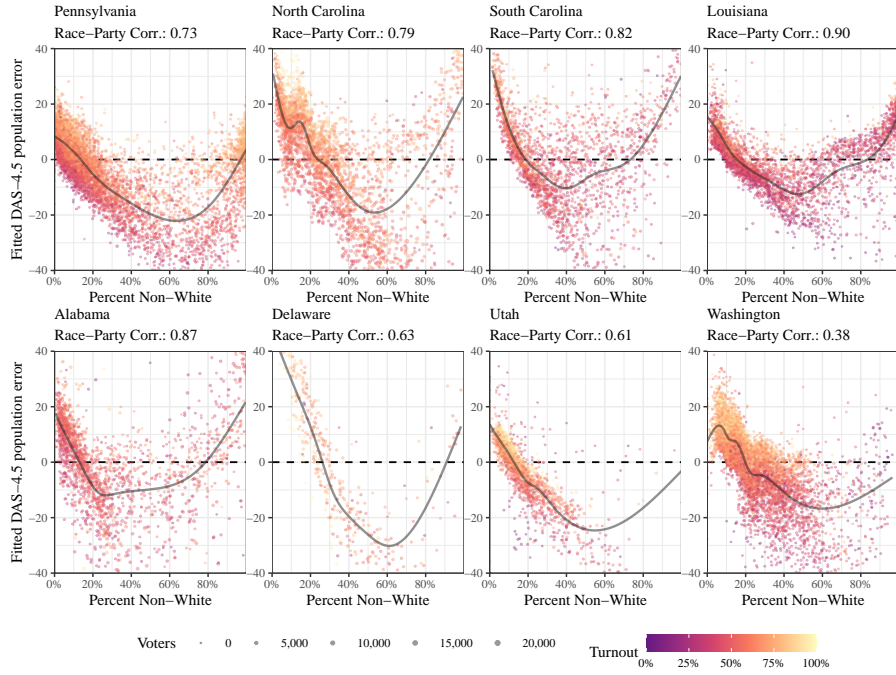

Figure S3.2: DAS-4.5 version of Figure 1.

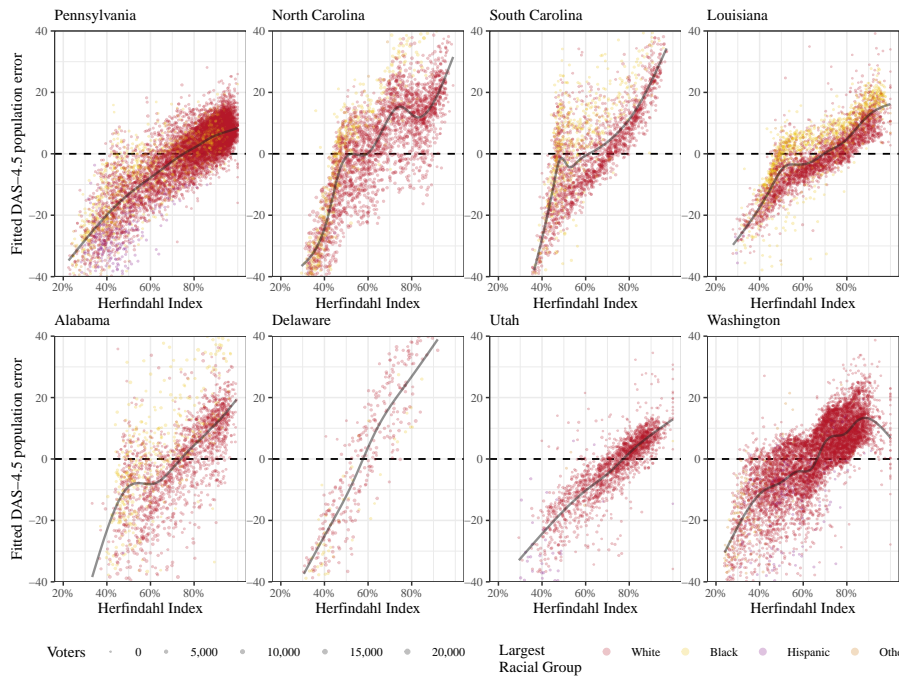

Figure S3.3: DAS-4.5 version of Figure 2.

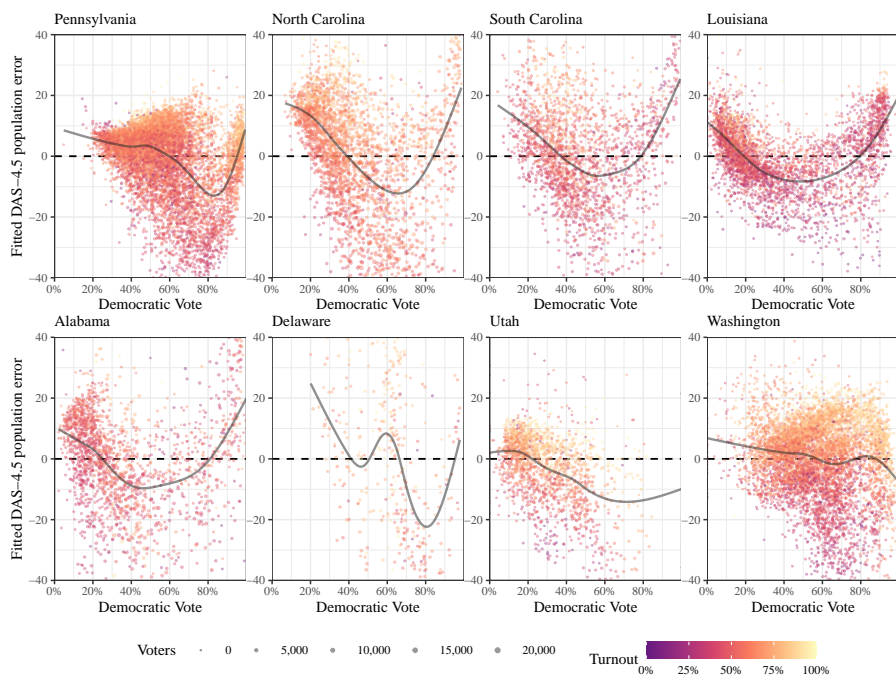

*Figure S3.4: DAS-4.5 version of Figure S3.1.*



## S4 Empirical Results with the DAS-19.61

Here we provide re-analyses of the main figures in the text with the DAS-19.61 data released August 12, 2021.

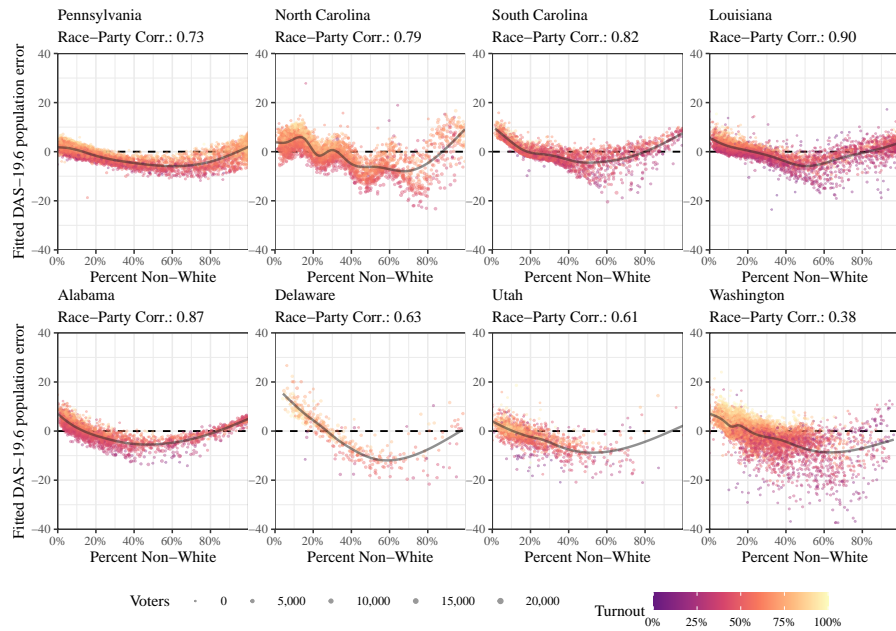

*Figure S4.1: DAS-19.61 version of Figure 1.*

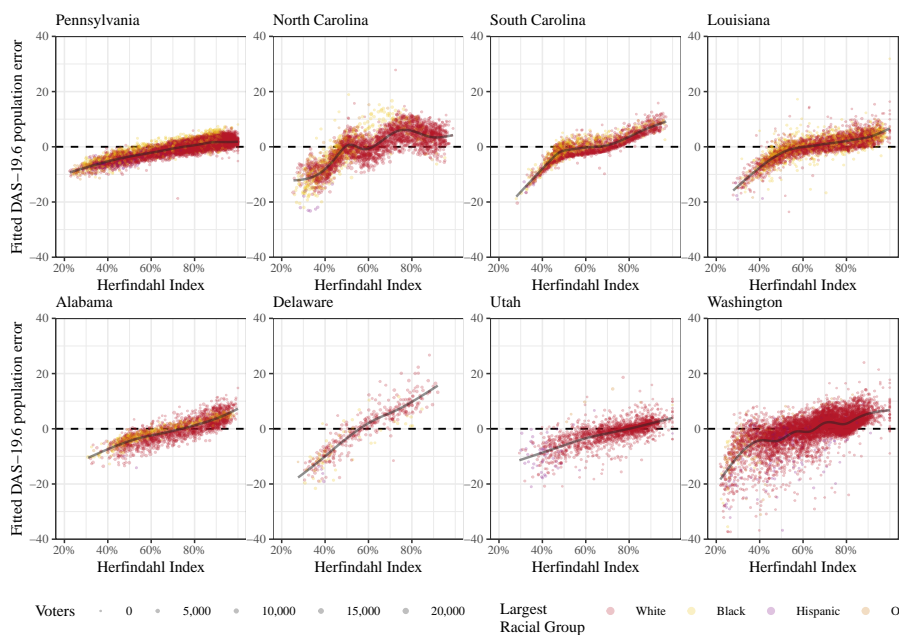

Figure S4.2: DAS-19.61 version of Figure 2.

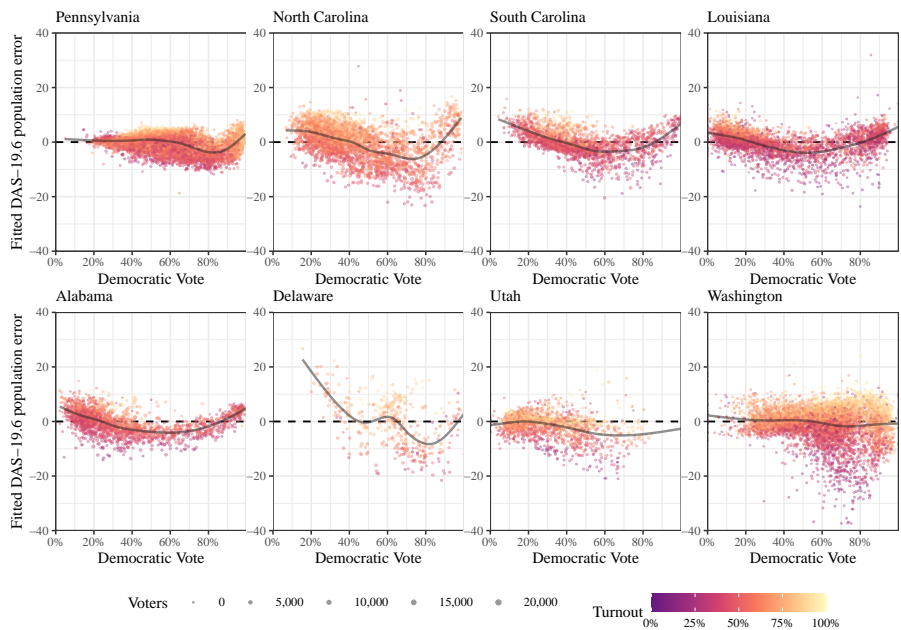

Figure S4.3: DAS-19.61 version of Figure S3.1.

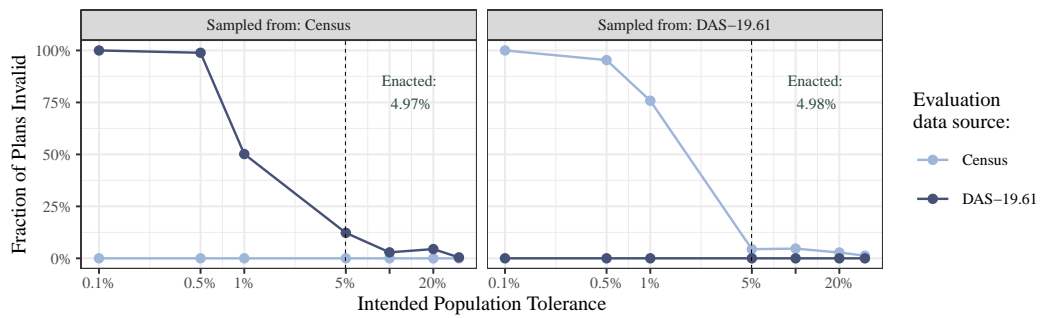

**Figure S4.4:** DAS-19.61 version of Figure 4. Fraction of Louisiana State Senate plans simulated under one data source with a population parity constraint which are invalid when measured under another. The horizontal axis shows the tolerance constraint for the original simulation on the log10 scale. The vertical axis shows the percent of plans that exceed the intended tolerance according to the evaluation data. The dashed line shows the maximum deviation from parity of the enacted 2010 map.

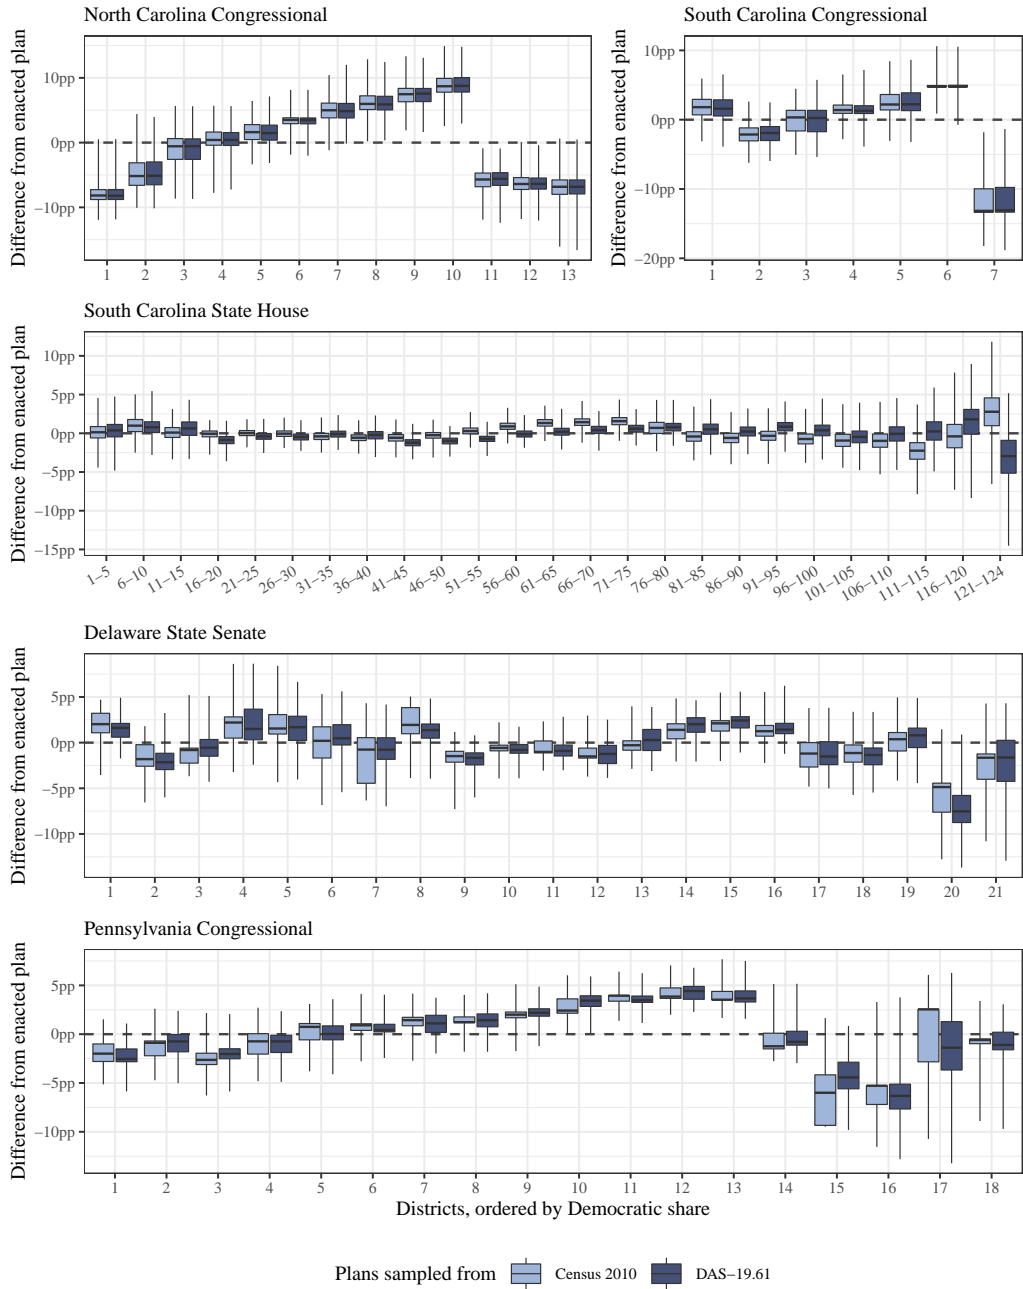

Figure S4.5: DAS-19.61 version of Figure 5.

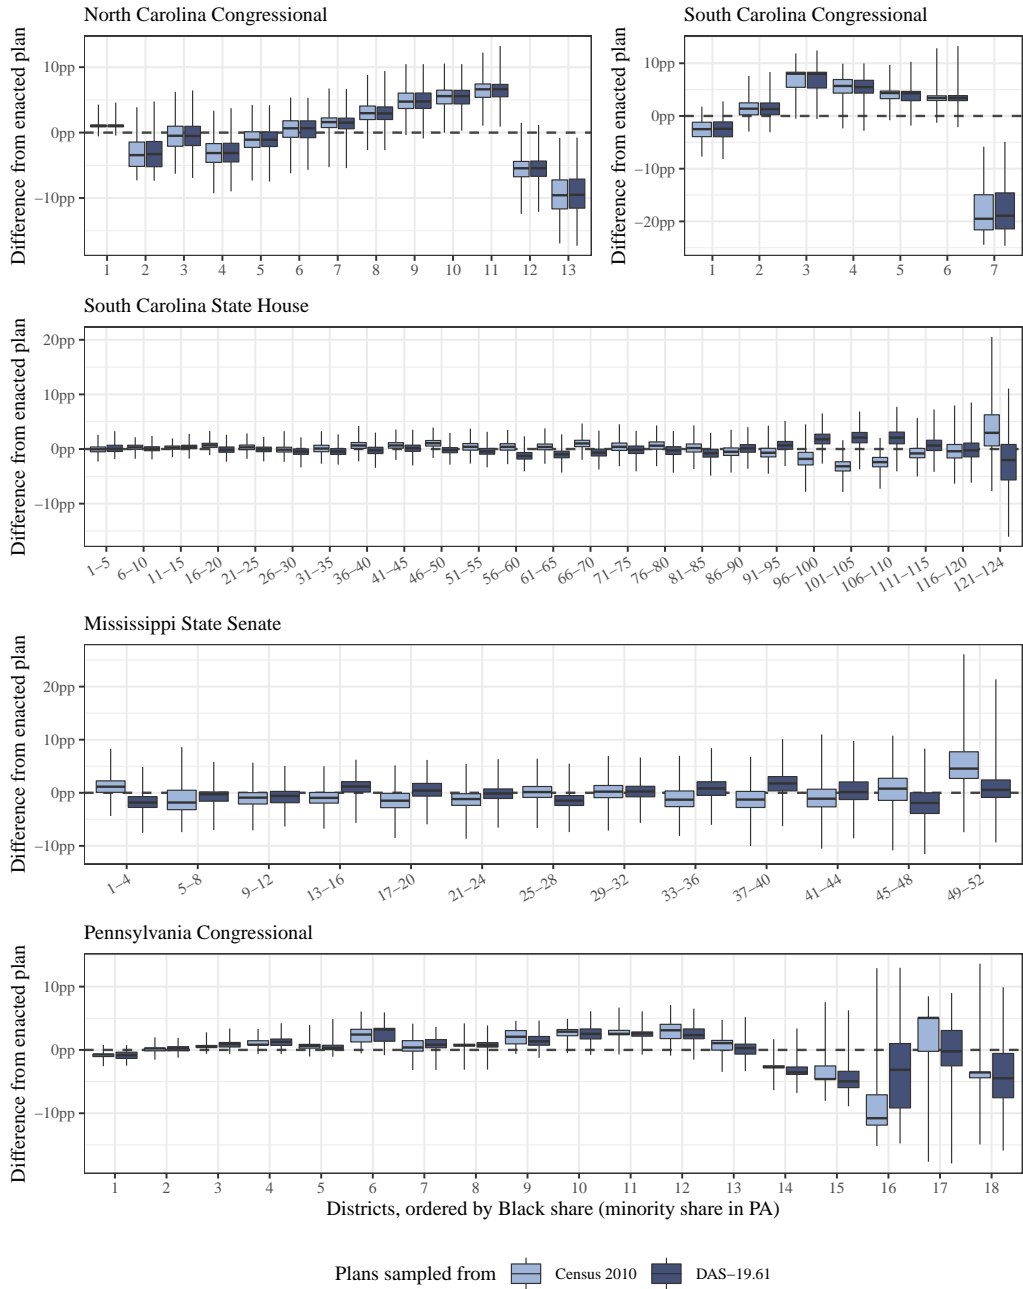

*Figure S4.6: DAS-19.61 version of Figure 6.*

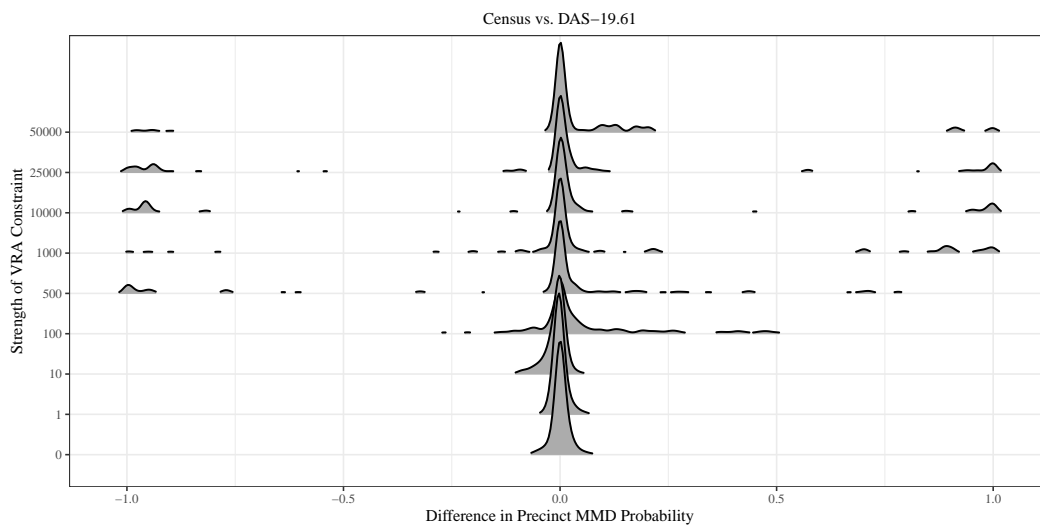

**Figure S4.7:** DAS-19.61 version of Figure 7. The calculated probability of being assigned to a majority-minority district can be much higher or lower for individual precincts, and these differences grow as a constraint encouraging the formation of MMDs is strengthened.

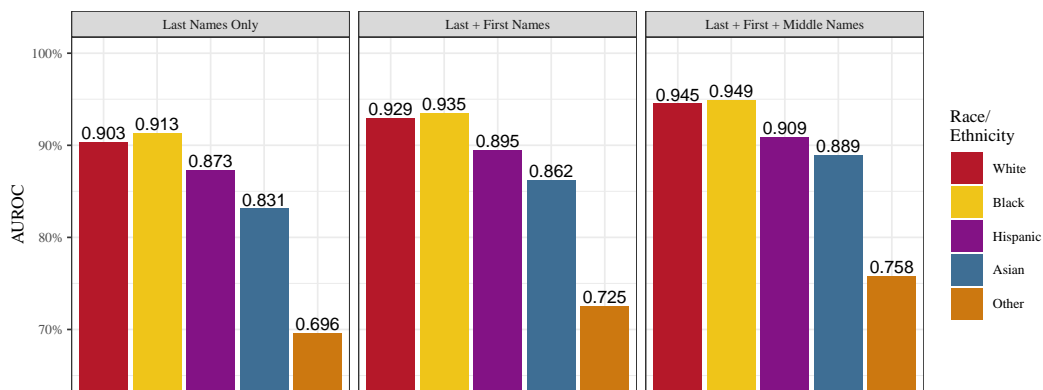

**Figure S4.8:** DAS-19.61 version of Figure 8. Area under the Receiver Operating Characteristic Curve (AUROC) percentage values for the prediction of each individual voter's race and ethnicity using the North Carolina voter file, with geographic priors given by the DAS-19.61 dataset.

| <b>Ethnicity</b>   | <b>Data</b>    | <b>Last</b> | <b>Last, First</b> | <b>Last, First, Middle</b> |
|--------------------|----------------|-------------|--------------------|----------------------------|
| Overall Error Rate |                | 15.5%       | 12.4%              | 10.2%                      |
| White              | False negative | 7.9%        | 5.8%               | 4.2%                       |
| White              | False positive | 11.5%       | 9.3%               | 7.9%                       |
| Black              | False negative | 29.5%       | 23.7%              | 20.7%                      |
| Black              | False positive | 24.2%       | 17.7%              | 12.8%                      |
| Hispanic           | False negative | 30.2%       | 27.4%              | 24.1%                      |
| Hispanic           | False positive | 29.1%       | 25.1%              | 21.8%                      |
| Asian              | False negative | 37.1%       | 30.2%              | 23.8%                      |
| Asian              | False positive | 34.5%       | 29.7%              | 25.7%                      |
| Other              | False negative | 74.7%       | 69.5%              | 64.0%                      |
| Other              | False positive | 48.8%       | 47.6%              | 45.0%                      |

**Table S4.1:** DAS-19.61 version of Tables S1.1, S1.2, S1.3. Overall classification error rate as well as false positive (Type I error) and false negative (Type II error) rates for White, Black, Hispanic, Asian, and Other voters using prediction based on geographic priors derived from the DAS-19.61 data.



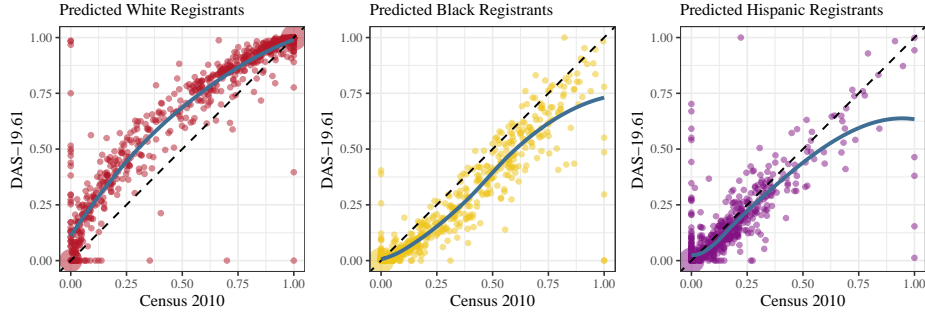

**Figure S4.9:** DAS-19.61 version of Figure 9. Imputed Racial Registrants by Census Blocks. The x-axis represents the percent of a group, as measured by the most likely race from racial imputation using the Census 2010 data. The y-axis represents the corresponding imputation using the DAS-19.61 data.

**Table S4.2:** DAS-19.61 version of Table S2.1. East Ramapo MMDs under Census 2010 and DAS-19.61 data. The noise introduced in the DAS-19.61 leads us to undercount the number of majority minority districts in many plans, but never to overcount them.

| Census 2010 | Number of MMDs from DAS-19.61 |           |           |          | Plans |
|-------------|-------------------------------|-----------|-----------|----------|-------|
|             | 0                             | 1         | 2         | 3        |       |
| 0           | <b>100%</b>                   | 0         | 0         | 0        | 4     |
| 1           | 26                            | <b>74</b> | 0         | 0        | 3,435 |
| 2           | 66                            | 14        | <b>20</b> | 0        | 6,462 |
| 3           | 0                             | 42        | 58        | <b>0</b> | 99    |

Note: Percentages add to 100% by row.

**Table S4.3:** *Difference in the population of existing Congressional Districts as computed by three DAS populations, relative to the enacted Congressional District Map. For each table and each state we show the minimum, median, maximum, and standard deviation of the difference in population. All numbers are rounded to whole numbers.*

**DAS-4.5**

| State          | Min   | Median | Mean | Max  | SD   | CDs |
|----------------|-------|--------|------|------|------|-----|
| Alabama        | -597  | -2     | 0    | 865  | 444  | 7   |
| Delaware       | 0     | 0      | 0    | 0    |      | 1   |
| Louisiana      | -1221 | 35     | 0    | 669  | 660  | 6   |
| Mississippi    | -262  | 12     | 0    | 237  | 210  | 4   |
| North Carolina | -1301 | -9     | 0    | 1659 | 657  | 13  |
| Pennsylvania   | -3996 | 0      | 0    | 3805 | 1453 | 18  |
| South Carolina | -467  | -173   | 0    | 1318 | 633  | 7   |
| Utah           | -1303 | 166    | 0    | 971  | 1065 | 4   |
| Washington     | -3128 | 54     | 0    | 2784 | 1617 | 10  |

**DAS-12.2**

| State          | Min   | Median | Mean | Max  | SD   | CDs |
|----------------|-------|--------|------|------|------|-----|
| Alabama        | -405  | -2     | 0    | 483  | 270  | 7   |
| Delaware       | 0     | 0      | 0    | 0    |      | 1   |
| Louisiana      | -471  | 30     | 0    | 314  | 259  | 6   |
| Mississippi    | -210  | 27     | 0    | 156  | 159  | 4   |
| North Carolina | -601  | -18    | 0    | 680  | 277  | 13  |
| Pennsylvania   | -2153 | 1      | 0    | 2164 | 765  | 18  |
| South Carolina | -287  | -6     | 0    | 485  | 256  | 7   |
| Utah           | -328  | -18    | 0    | 363  | 291  | 4   |
| Washington     | -2099 | 98     | 0    | 1413 | 1075 | 10  |

**DAS-19.61**

| State          | Min  | Median | Mean | Max | SD  | CDs |
|----------------|------|--------|------|-----|-----|-----|
| Alabama        | -163 | 17     | 0    | 161 | 102 | 7   |
| Delaware       | 0    | 0      | 0    | 0   |     | 1   |
| Louisiana      | -196 | 56     | 0    | 96  | 115 | 6   |
| Mississippi    | -150 | 36     | 0    | 79  | 104 | 4   |
| North Carolina | -216 | 10     | 0    | 319 | 133 | 13  |
| Pennsylvania   | -122 | -12    | 0    | 121 | 61  | 18  |
| South Carolina | -100 | 8      | 0    | 89  | 72  | 7   |
| Utah           | -42  | 6      | 0    | 29  | 30  | 4   |
| Washington     | -143 | 13     | 0    | 200 | 92  | 10  |
